# Supplementary material for: Genetic and functional diversity of double-stranded DNA viruses in a tropical monsoonal estuary, India
Source: PubMed Central journal article supplement (PMC6207776; doi:10.1038/s41598-018-34332-8), 2018-10-30
Supplement: 41598_2018_34332_MOESM1_ESM.pdf [file 41598_2018_34332_MOESM1_ESM.pdf]

**Genetic and functional diversity of double-stranded DNA viruses in a tropical monsoonal estuary, India**

*Jasna Vijayan<sup>1</sup>, Parvathi Ammini<sup>1</sup>, Abhinandita Dash<sup>2</sup>*

*<sup>1</sup>CSIR-National Institute of Oceanography, Regional Centre, Kochi-682 018, India*

*<sup>2</sup>Genotypic Technology, Bangalore - 560094, India*

**Supplementary information**

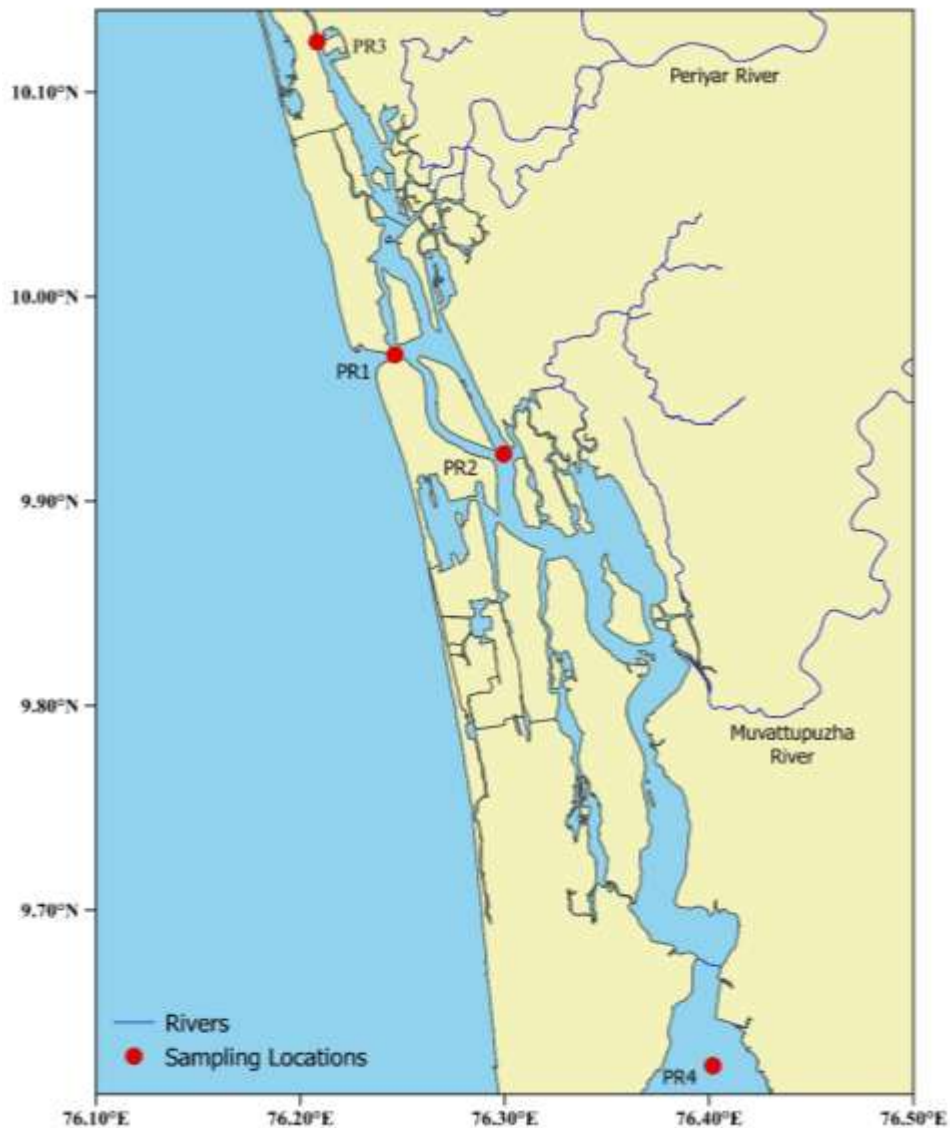

**Supplementary Figure 1. Map showing sampling stations in Cochin estuary (CE).** Station PR1 is the inlet. Station PR2 and PR3, represent the mesohaline region and station PR4 represent the freshwater region of the CE. The station map was created with the tool QGIS (version 2.18, Quantum GIS Development Team, 2017. Quantum GIS Geographic Information System). Quantum GIS Development Team, 2017. Quantum GIS Geographic Information System. Open Source Geospatial Foundation Project. "<http://qgis.osgeo.org>"). The legends included in the map such as rivers (Made with Natural Earth. Free vector and raster map data @ [naturalearthdata.com](http://www.naturalearthdata.com),) (<http://www.diva-gis.org/>).

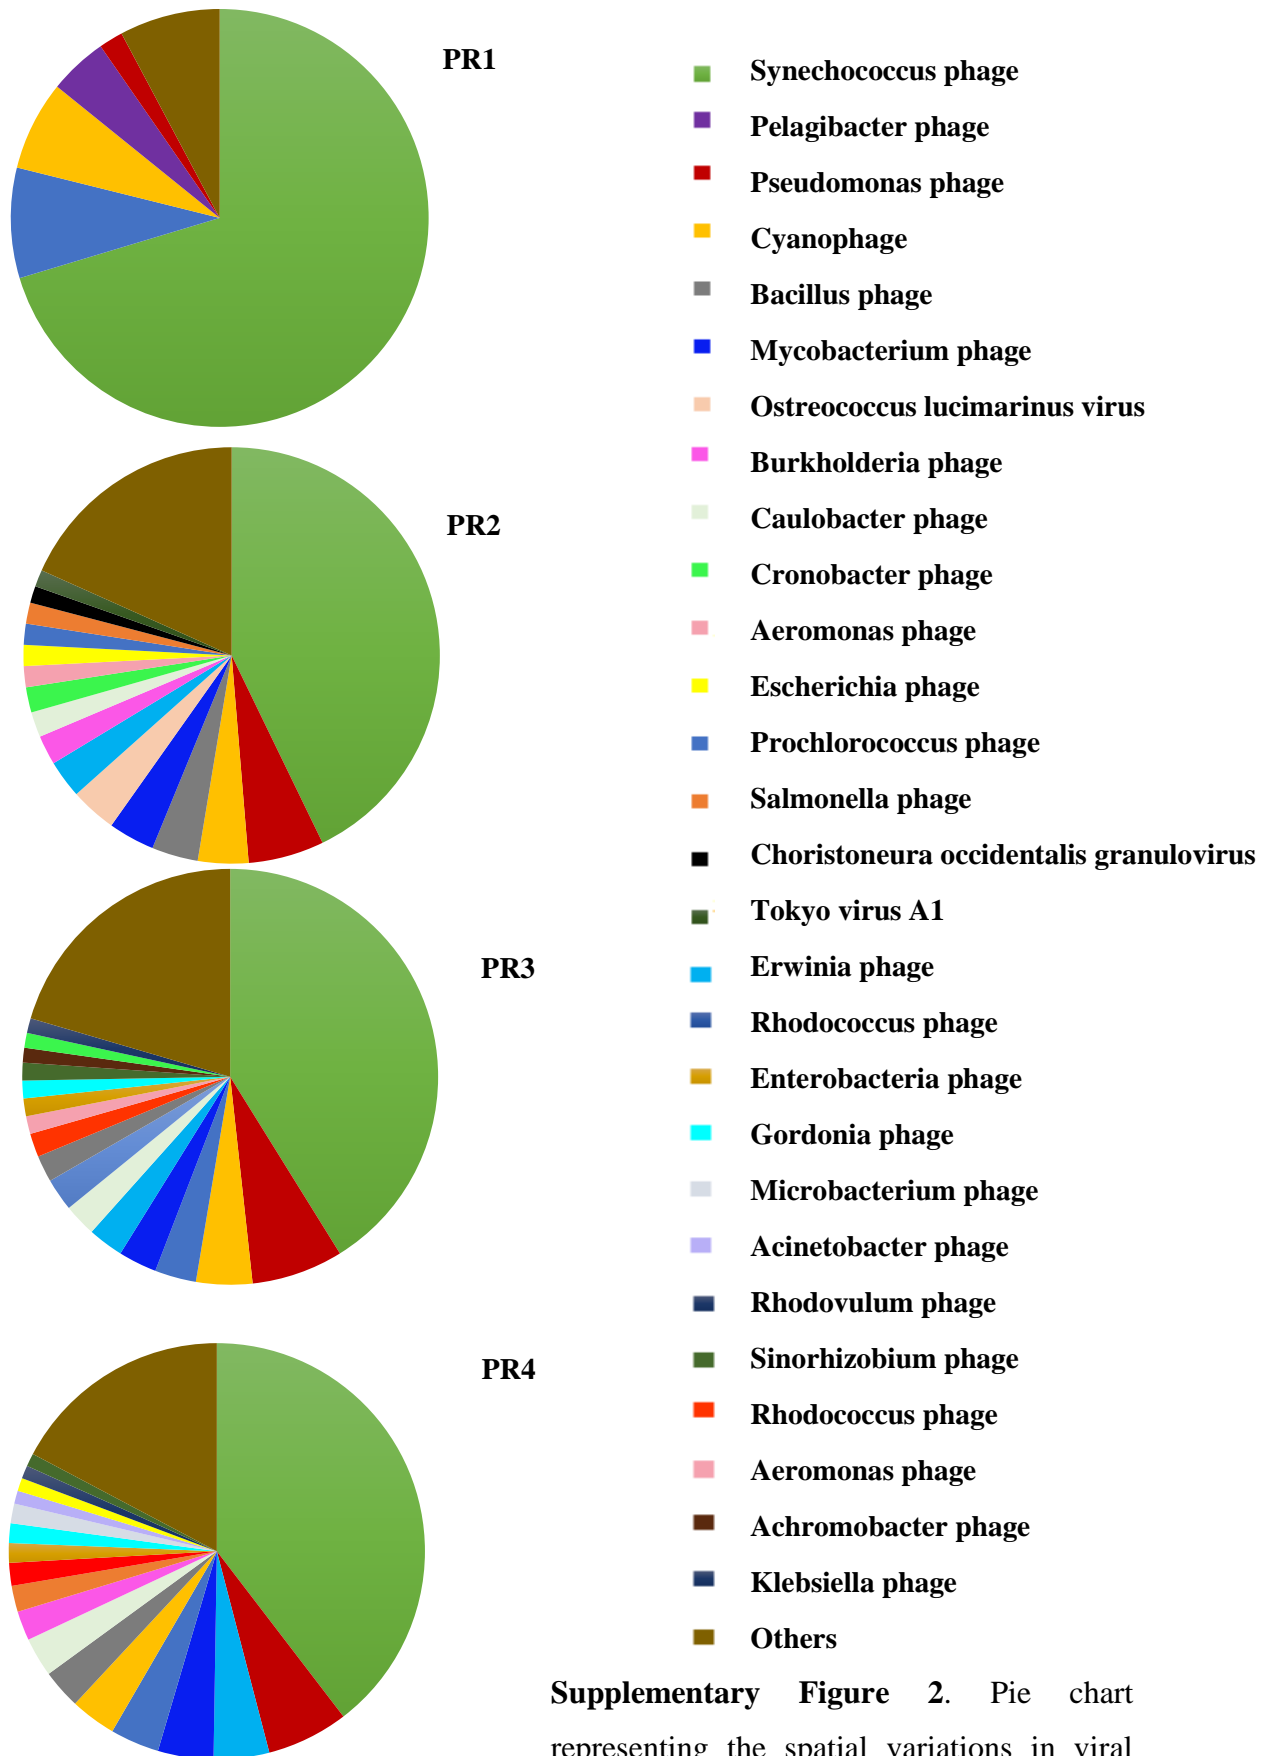

**Supplementary Figure 2.** Pie chart representing the spatial variations in viral species at four stations PR1, PR2, PR3 and

(3A)

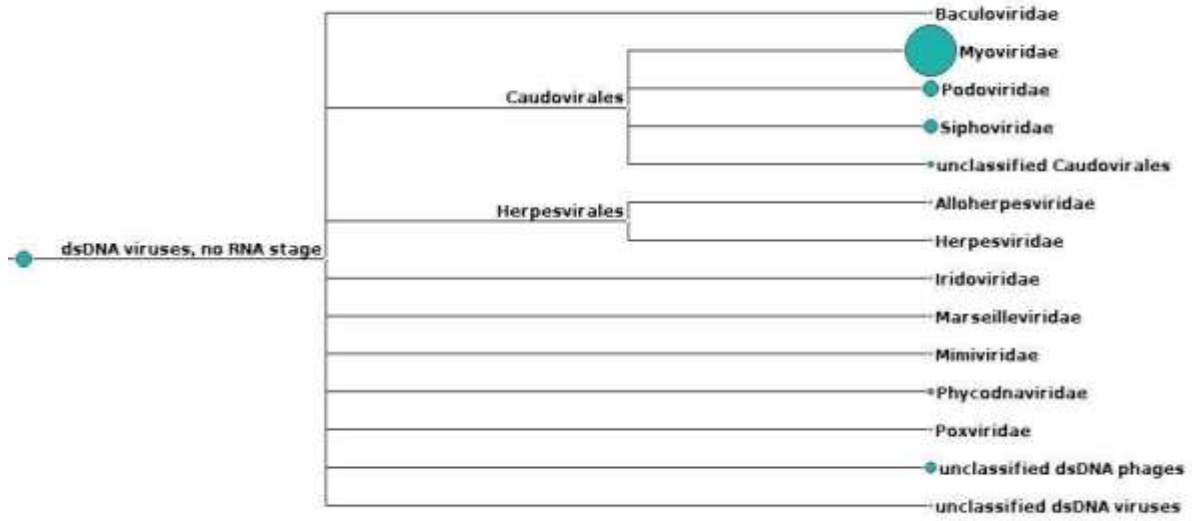

(3b)

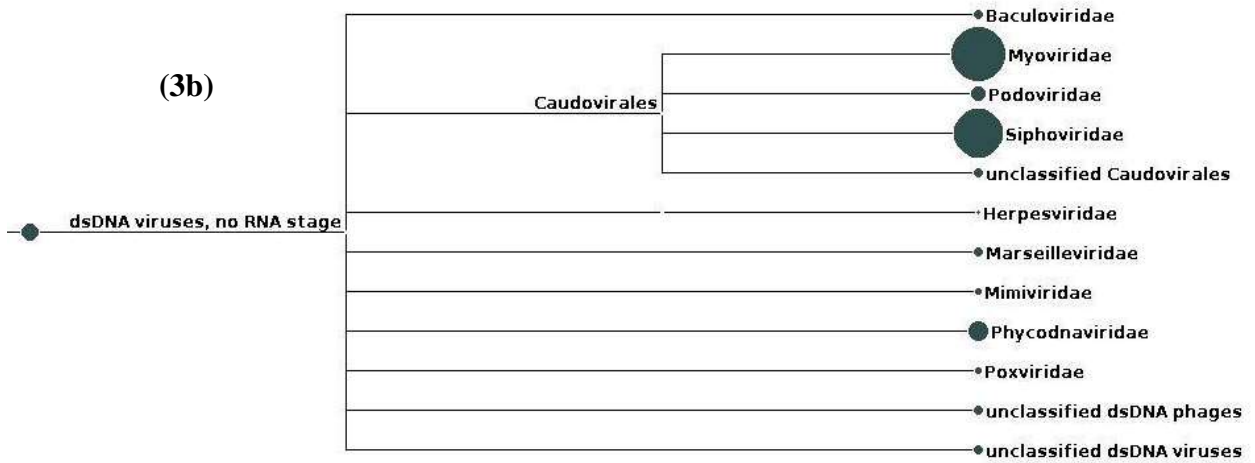

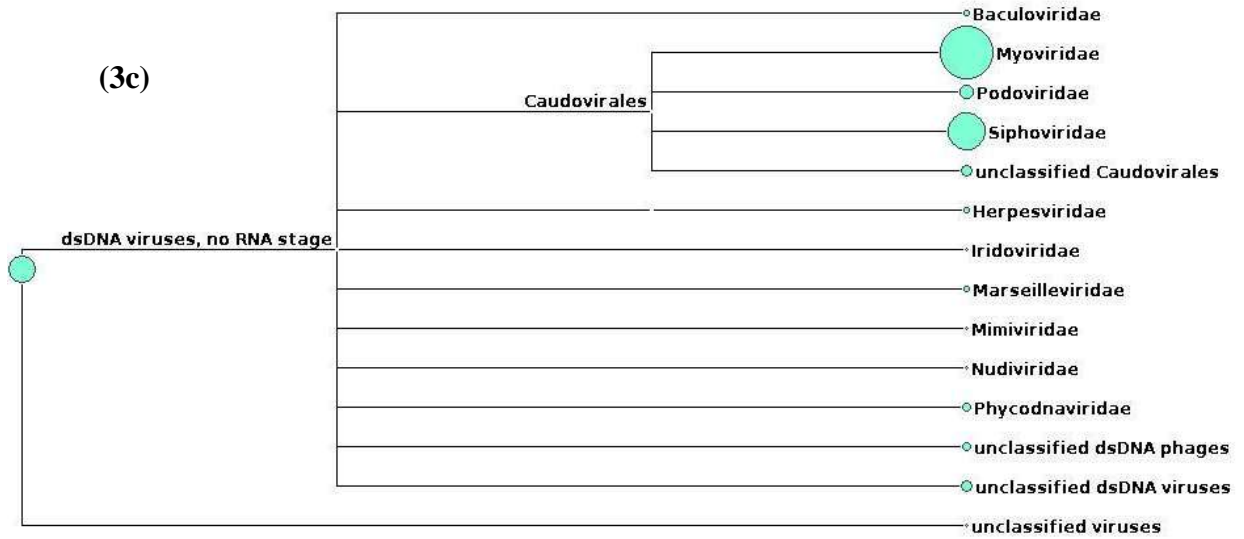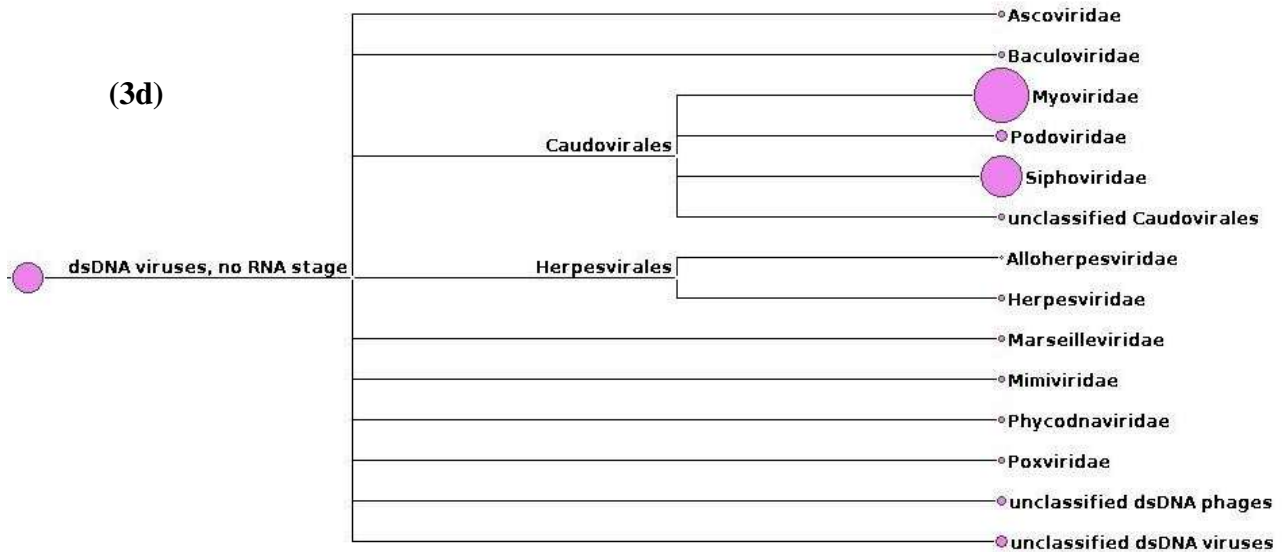

**Supplementary Figure 3. Phylogenetic tree of viral families from four different stations.** The panels a, b, c and d represent the stations PR1, PR2, PR3 and PR4 in the Cochin estuary.

(4a)

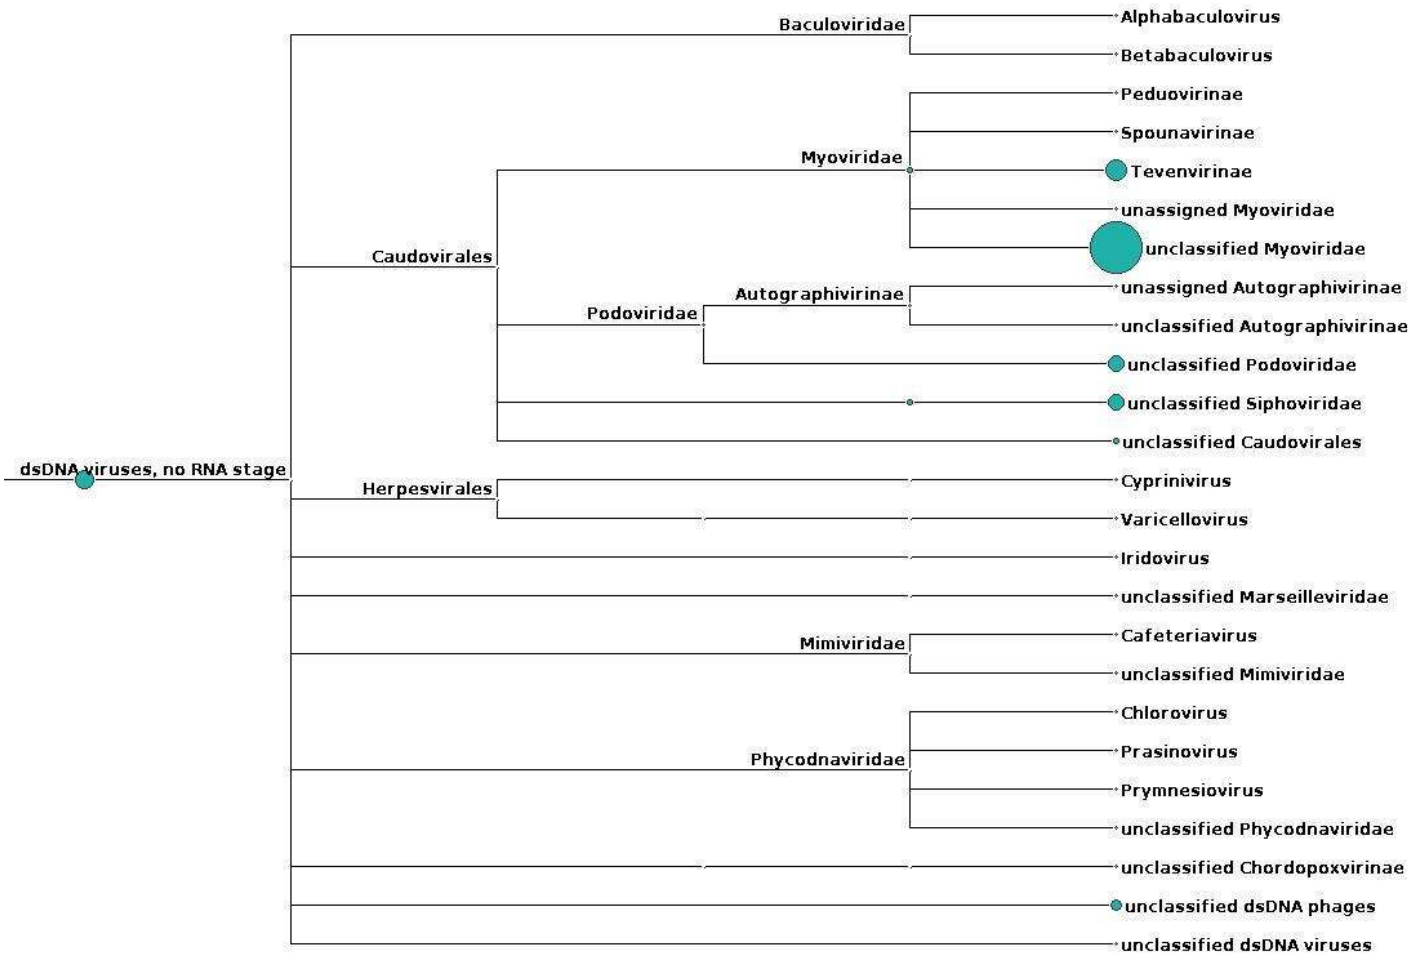

(4b)

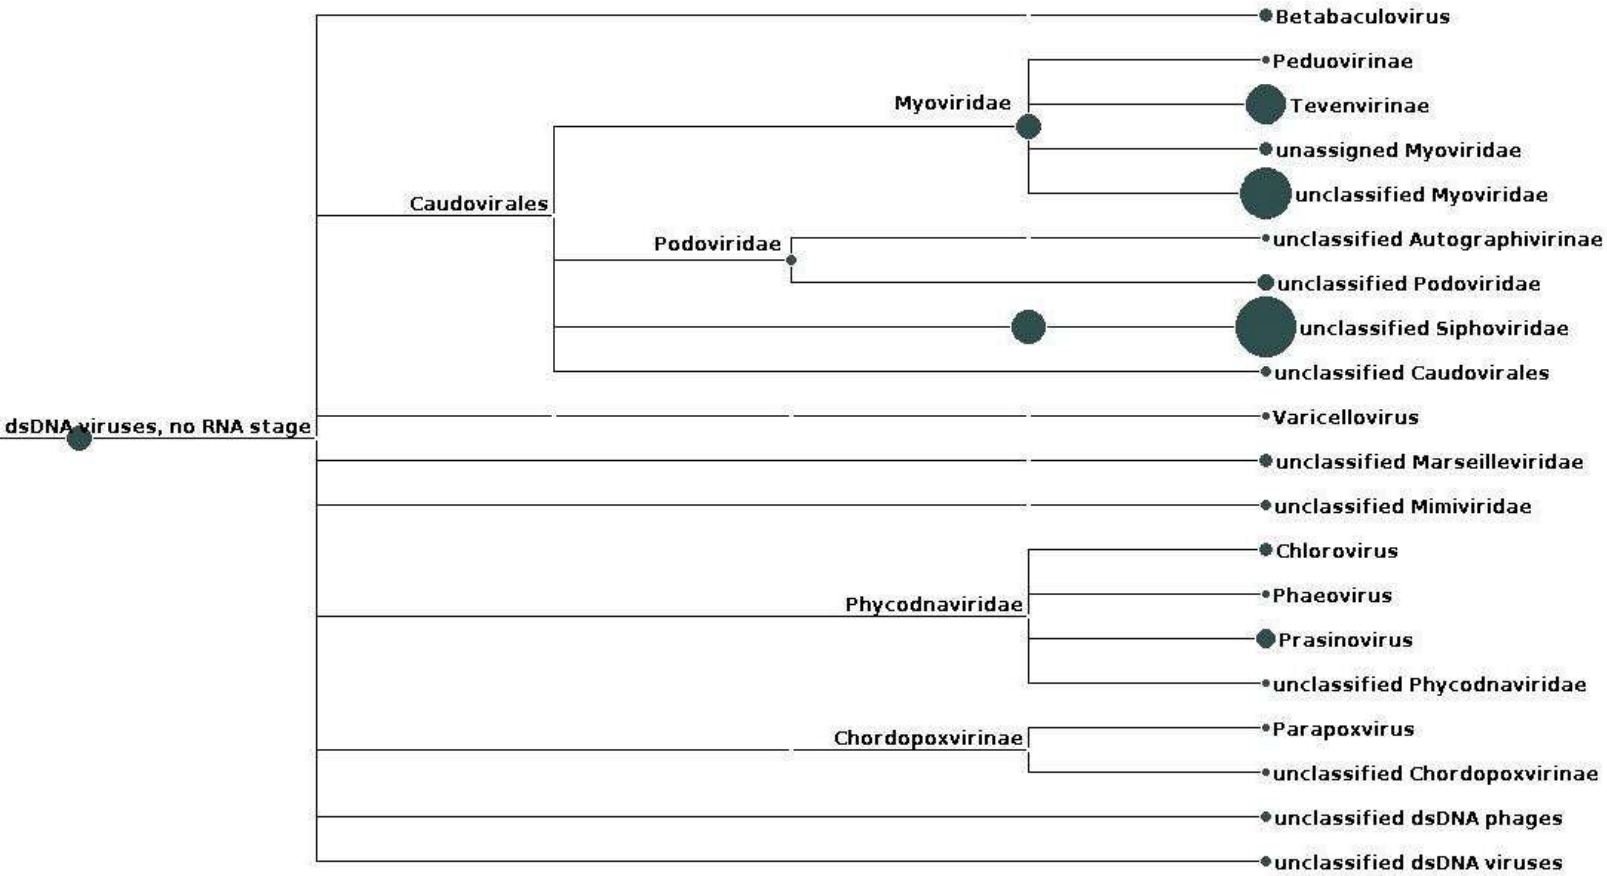

(4c)

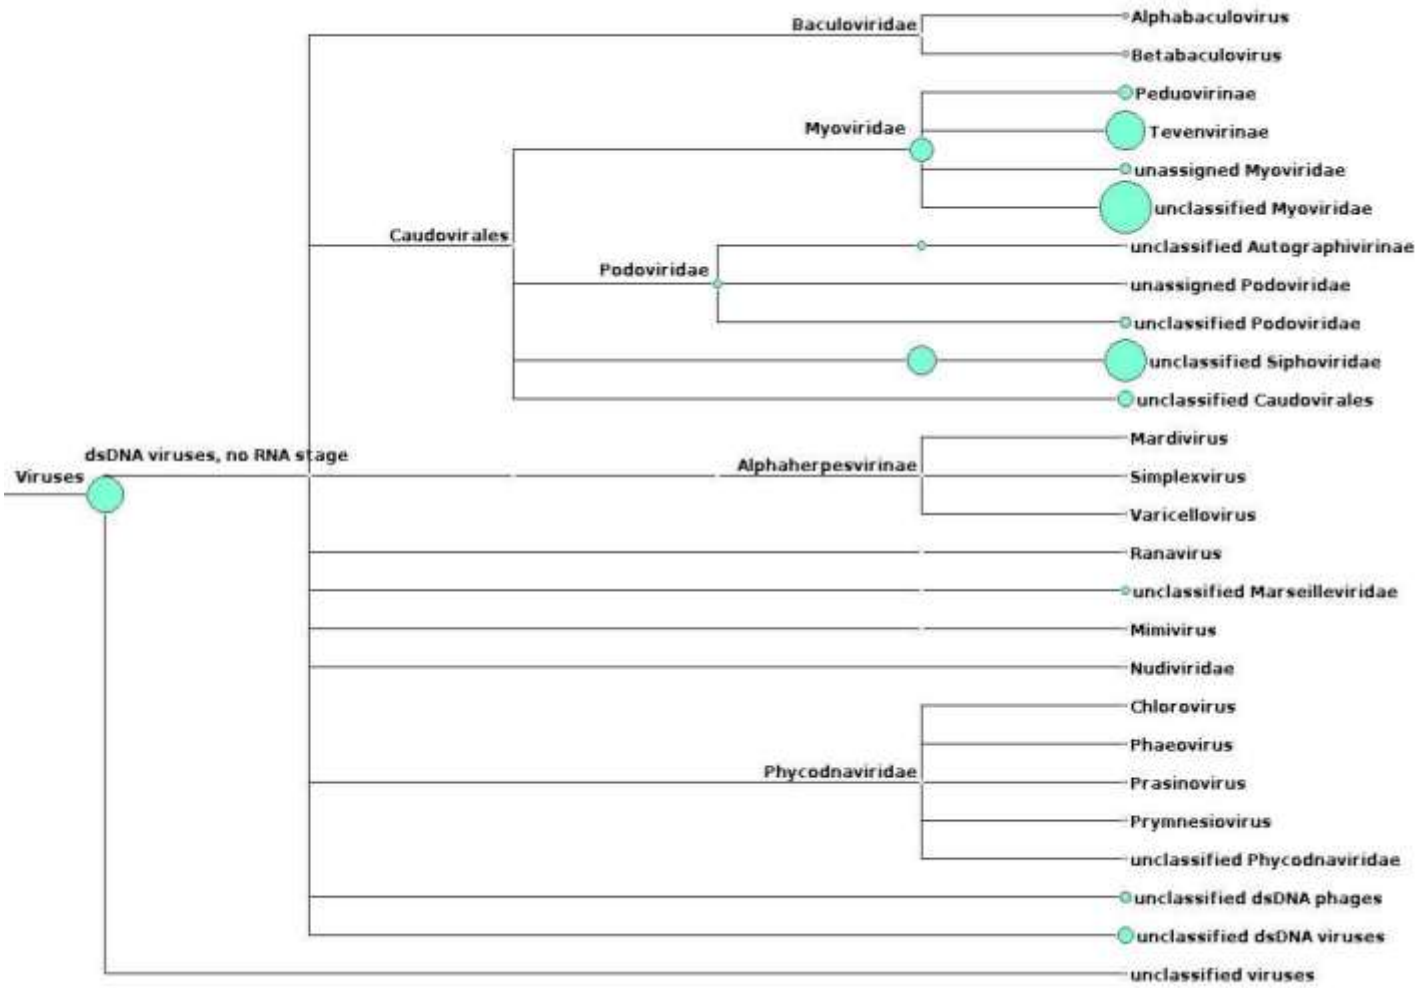



(4d)

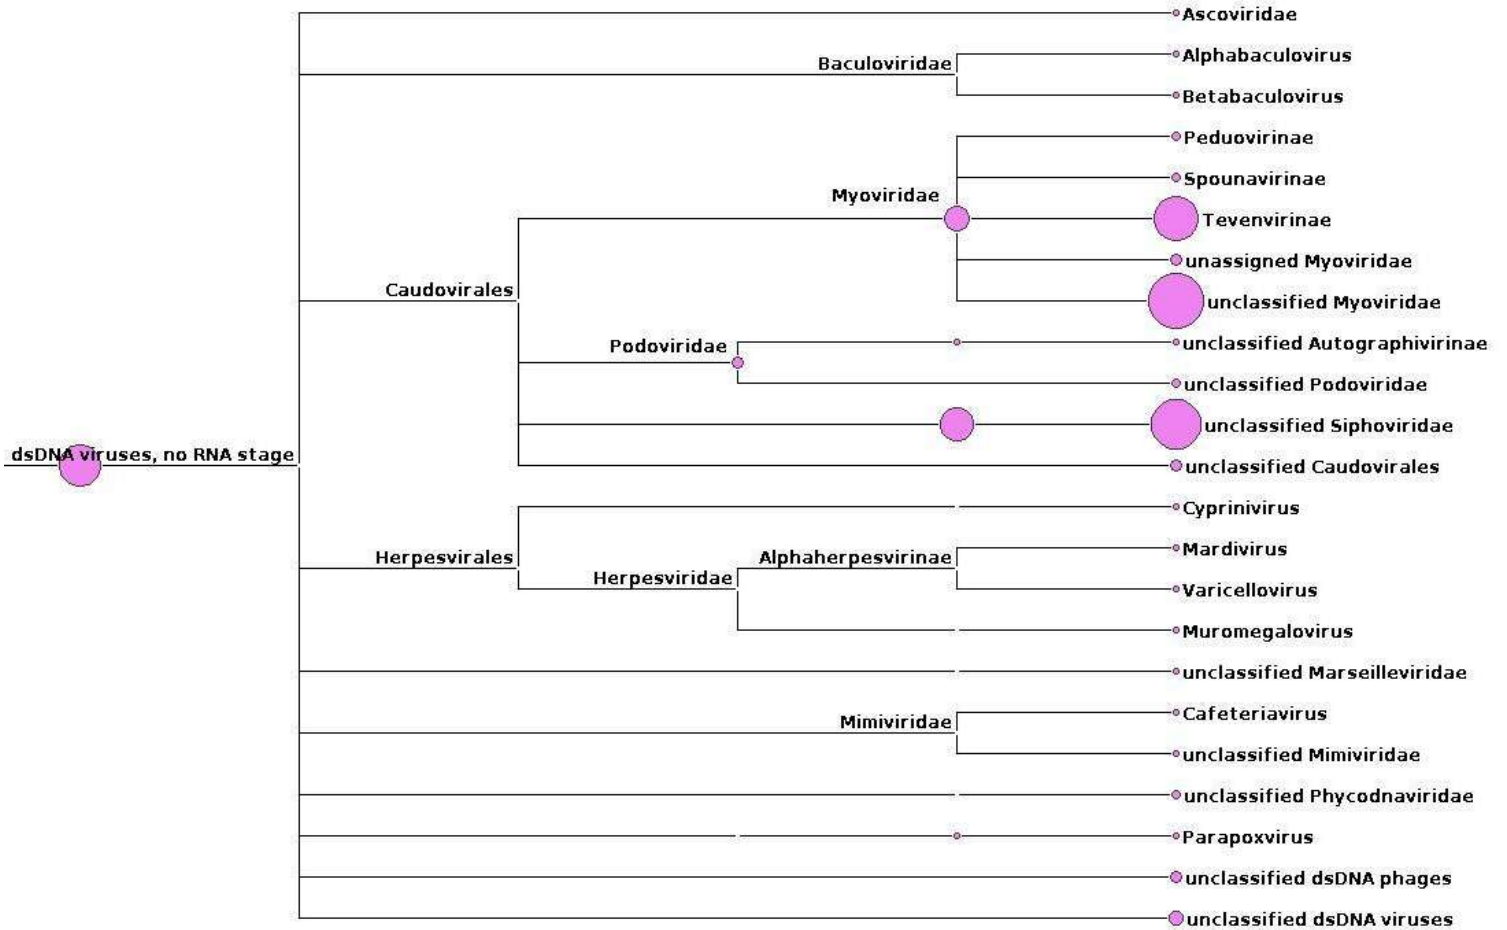

**Supplementary Figure 4. Phylogenetic tree of viruses at genus level from four different stations.** The panels a, b, c and d represent the stations PR1, PR2, PR3 and PR4 in the Cochin estuary.

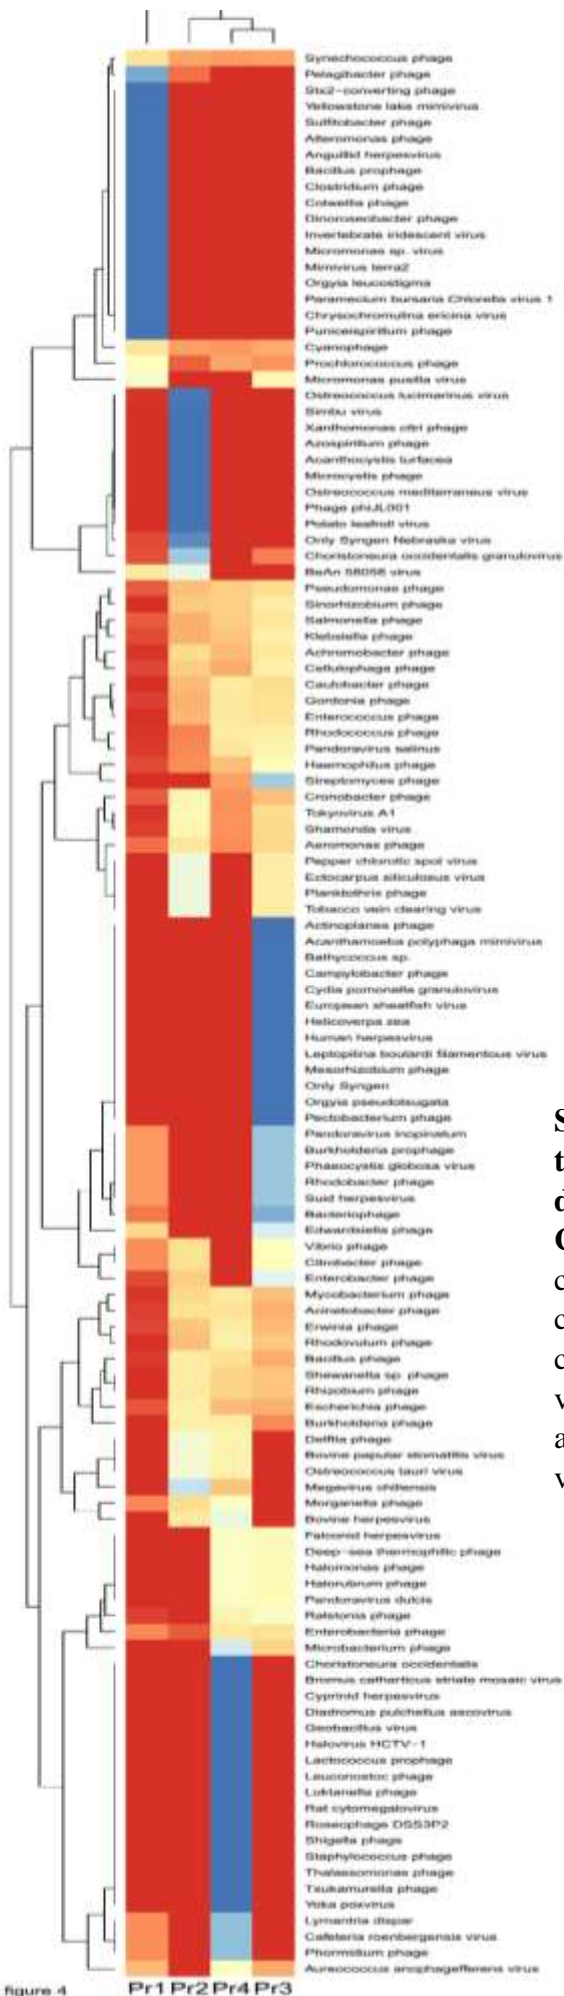

**Supplementary Figure 5.** Heat map representing the spatial distribution of viral species from four different stations, PR1, PR2, PR3 and PR4 in the Cochin Estuary. In heat map the individual values contained in a matrix are represented as colors. The cells in the matrix with high relative values are colored differently from those with low relative values and is generated for all the identified species across the samples based on their relative abundance values.
